# Supplementary material for: An improved environmental DNA assay for bull trout (Salvelinus confluentus) based on the ribosomal internal transcribed spacer I
Source: PubMed Central journal article supplement (PMC6219789; doi:10.1371/journal.pone.0206851), 2018-11-06

**A**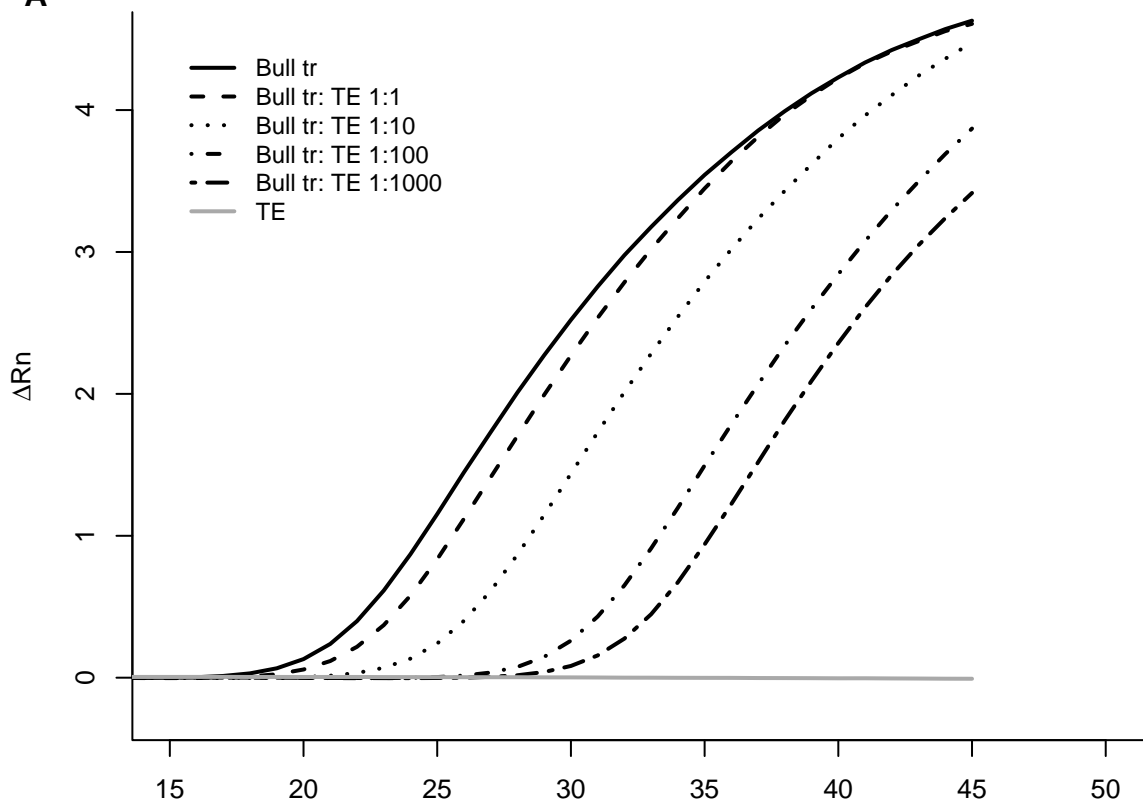**B**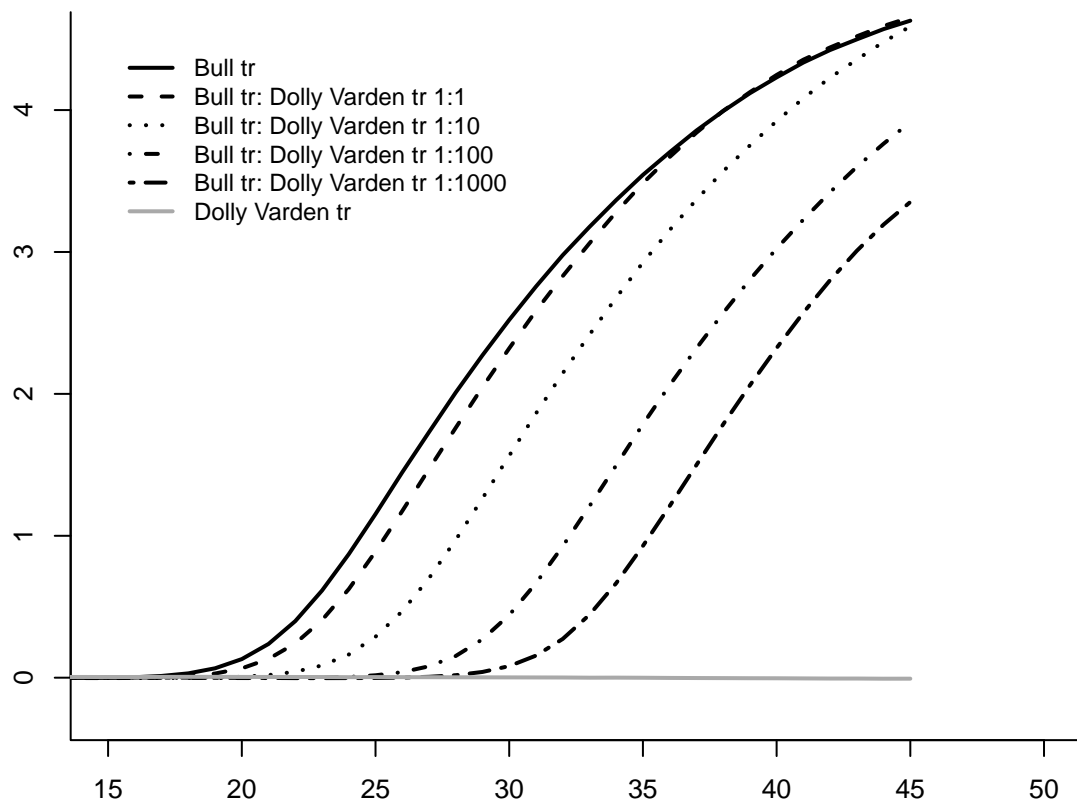**C**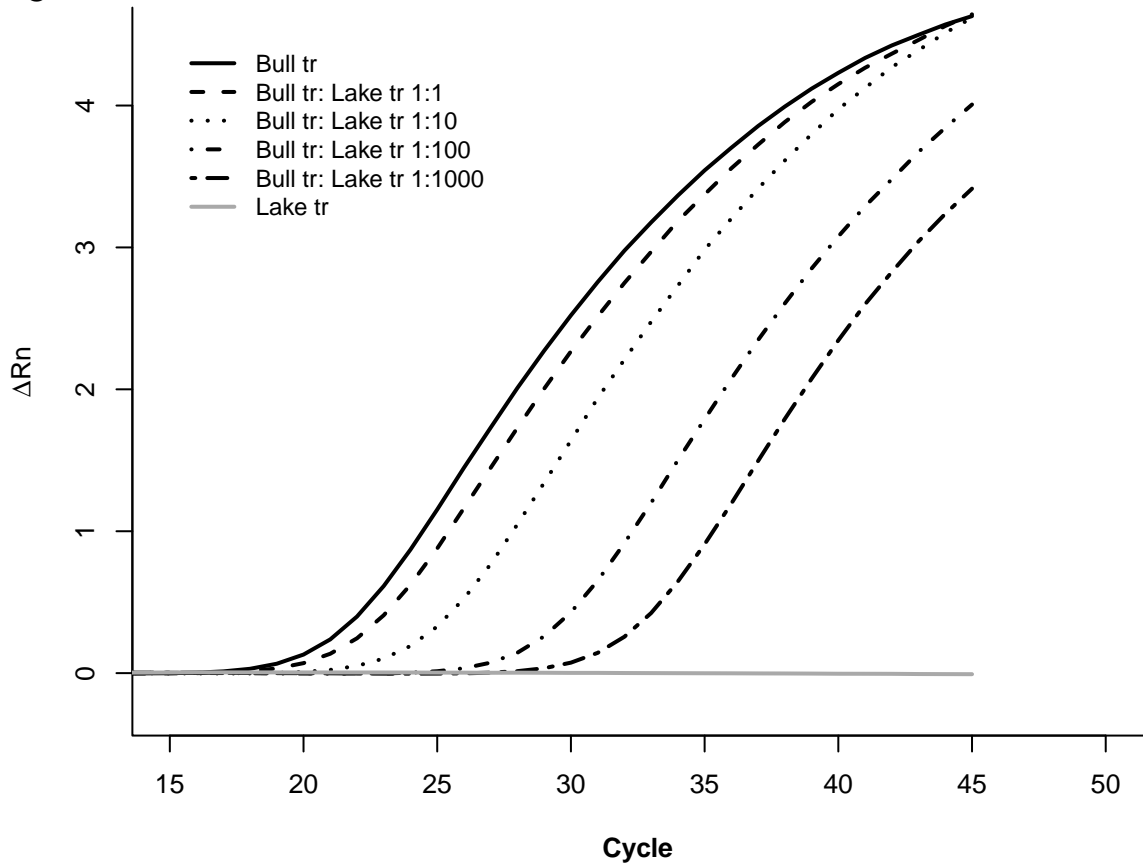**D**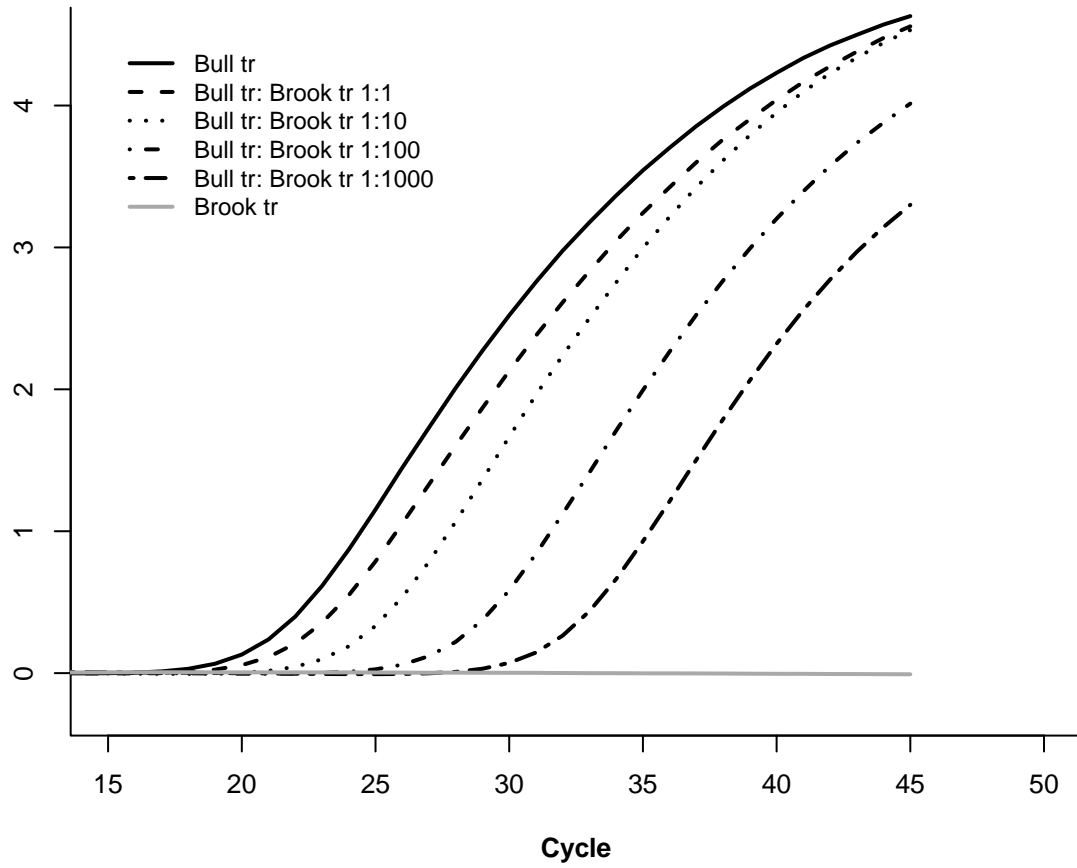

Supplement: pone.0206851.s005.pdf [file pone.0206851.s005.pdf]
